# Supplementary material for: The Combination of RNA and Protein Profiling Reveals the Response to Nitrogen Depletion in Thalassiosira pseudonana
Source: PubMed Central journal article supplement (PMC5566445; doi:10.1038/s41598-017-09546-x), 2017-08-21
Supplement: 41598_2017_9546_MOESM2_ESM.pdf [file 41598_2017_9546_MOESM2_ESM.pdf]

**The Combination of RNA and Protein Profiling Reveals the Response to Nitrogen Depletion in *Thalassiosira pseudonana***

Jianbo Jian<sup>a</sup>, Dezhi Zeng<sup>a</sup>, Wei Wei<sup>a</sup>, Hongmin Lin<sup>a</sup>, Ping Li<sup>a\*</sup>, Wenhua Liu<sup>a\*</sup>

<sup>a</sup> Marine Biology Institute, Shantou University, Shantou, Guangdong 515063, P.R. China

**\* Correspondence to: Liu Wenhua (PhD)**

**Marine Biology Institute**

**Shantou University**

**Shantou, Guangdong 515063,**

**P.R. China**

**Tel.:** +86-754-86503269

**E-mail:** [whliu@stu.edu.cn](mailto:whliu@stu.edu.cn)

**Li Ping (PhD)**

**Marine Biology Institute**

**Shantou University**

**Shantou, Guangdong 515063,**

**P.R. China**

**Tel.:** +86-754-86503269

**E-mail:** [liping@stu.edu.cn](mailto:liping@stu.edu.cn)

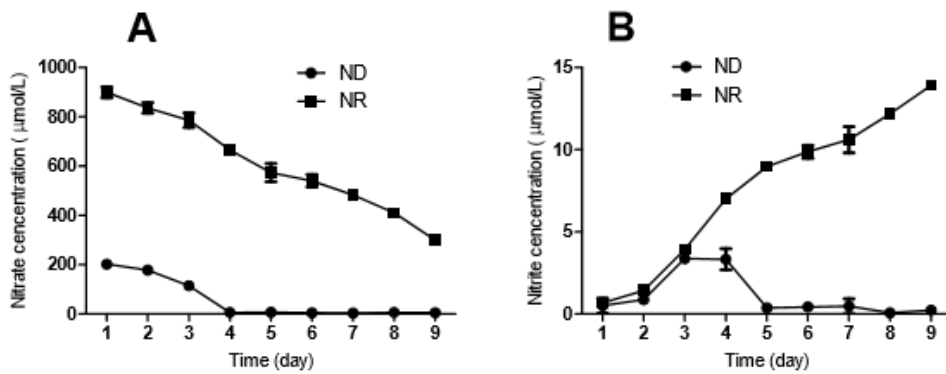

**Figure S1. Detection of the N concentration in culture medium.** (A) Nitrate concentration in the medium. (B) Nitrite concentration in the medium. Data are displayed as the means  $\pm$  SD (n = 3).

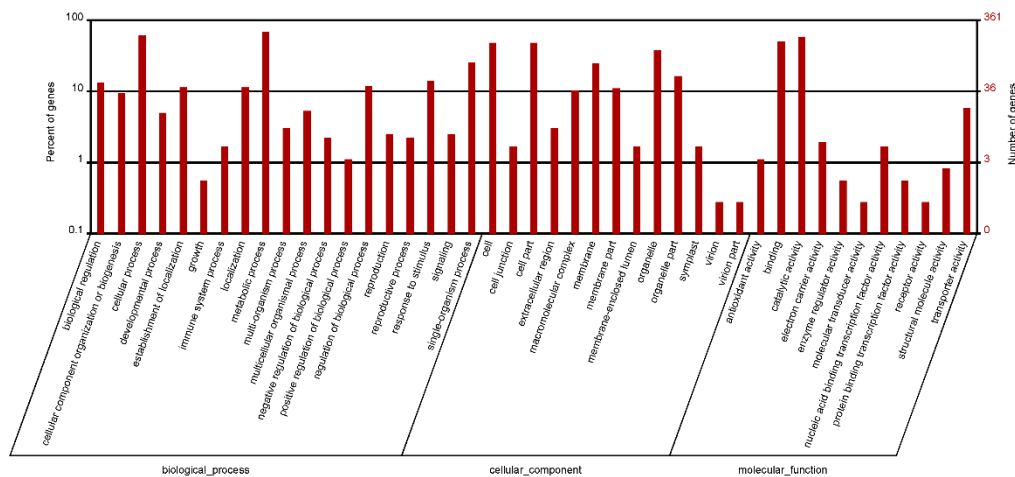

**Figure S2. Histogram presentation of the Gene Ontology classification for DEGs.** Three main categories are summarized for the significant DEGs: biological process, cellular component and molecular function. The right y-axis indicates the number of genes in a category. The left y-axis indicates the percentage of a specific category of genes in that main category.

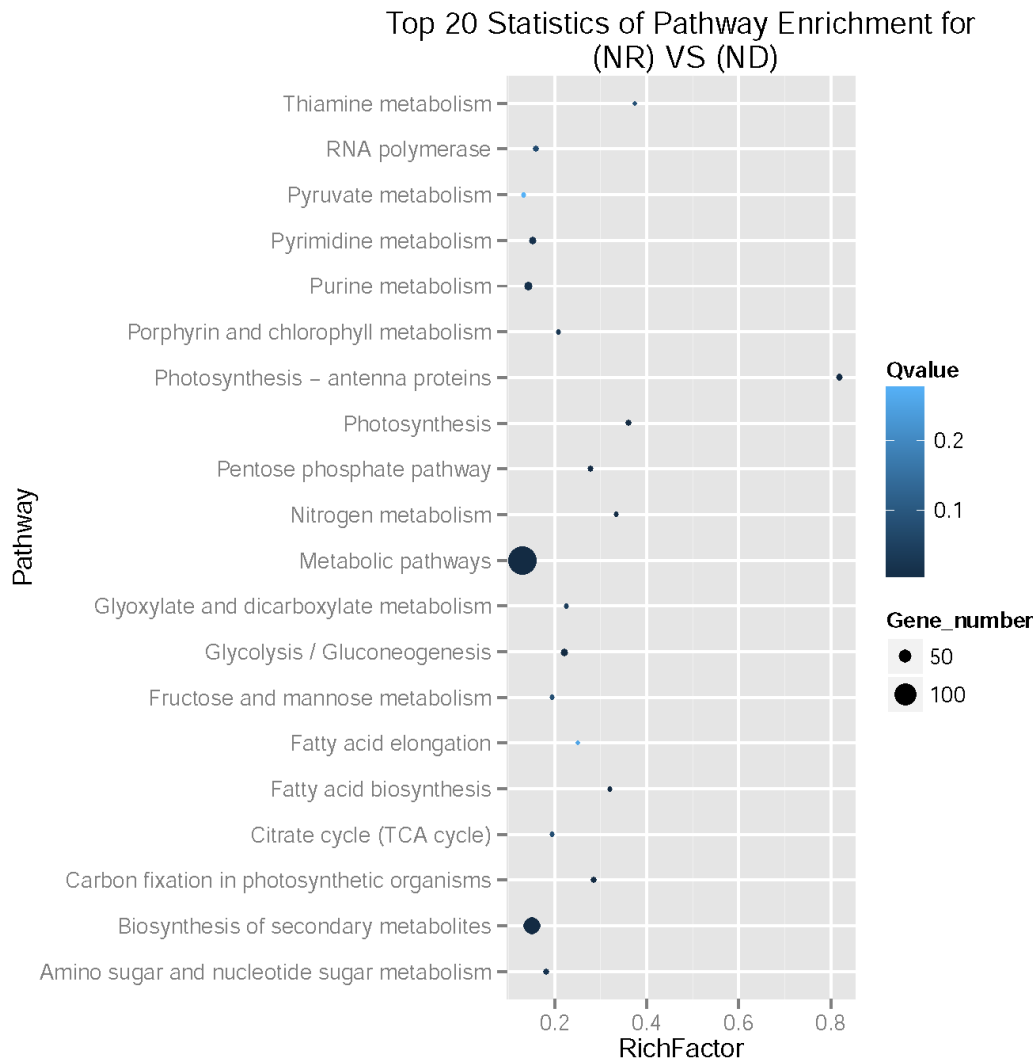

**Figure S3. Scatterplot of the KEGG pathway enrichment statistics of DEGs between NR and ND.** The RichFactor is the ratio of the number of differentially expressed genes annotated in that pathway to the number of all genes annotated to that pathway term. A larger RichFactor is associated with a higher intensity. The Q value is a corrected p-value ranging from 0~1, and a lower Q value is associated with a higher intensity. This figure only displays the top 20 pathway terms that were enriched.

**Table S1.** The N-depleted and N-replete reads were mapped to the *T. pseudonana* genome and genes.

|                          | N depletion  |            | N repletion  |            |
|--------------------------|--------------|------------|--------------|------------|
|                          | Reads number | Percentage | Reads number | Percentage |
| Map to Genome            |              |            |              |            |
| Total Reads (a)          | 6,264,454    | 100.00%    | 6,249,215    | 100.00%    |
| Total Base pairs (a)     | 306,958,246  | 100.00%    | 306,211,535  | 100.00%    |
| Total Mapped Reads (b)   | 4,016,018    | 64.11%     | 4,054,120    | 64.87%     |
| Perfect match (c)        | 3,232,684    | 51.60%     | 3,277,736    | 52.45%     |
| <=3bp mismatch (d)       | 783,334      | 12.50%     | 776,384      | 12.42%     |
| Unique match (e)         | 3,843,747    | 61.36%     | 3,868,505    | 61.90%     |
| Multi-position match (f) | 172,271      | 2.75%      | 185,615      | 2.97%      |
| Total Unmapped Reads (g) | 2,248,436    | 35.89%     | 2,195,095    | 35.13%     |
| Map to Gene              |              |            |              |            |
| Total Reads (a)          | 6,264,454    | 100.00%    | 6,249,215    | 100.00%    |
| Total Base pairs (a)     | 306,958,246  | 100.00%    | 306,211,535  | 100.00%    |
| Total Mapped Reads (b)   | 2,683,085    | 42.83%     | 2,669,117    | 42.71%     |
| Perfect match (c)        | 2,190,662    | 34.97%     | 2,192,715    | 35.09%     |
| <=2bp mismatch (d)       | 492,423      | 7.86%      | 476,402      | 7.62%      |
| Unique match (e)         | 2,572,610    | 41.07%     | 2,551,580    | 40.83%     |
| Multi-position match (f) | 110,475      | 1.76%      | 117,537      | 1.88%      |
| Total Unmapped Reads (g) | 3,581,369    | 57.17%     | 3,580,098    | 57.29%     |

**Dataset 1.** Statistics for photosynthesis- and carbon fixation-related transcripts. The results are shown for the NR and ND treatments, including expression, RPKM, FDR and annotation data (KEGG Orthology, GO Component, Function and Process).
